# Supplementary material for: Wafer-scale, highly uniform, and well-arrayed suspended nanostructures for enhancing the performance of electronic devices
Source: Royal Society of Chemistry journal article supplement (doi:10.1039/d1nr07375c), 2021-12-30
Supplement: d1nr07375c1.pdf [file d1nr07375c1.pdf]

# Wafer-scale, highly uniform, and well-arrayed suspended nanostructures for enhancing the performance of electronic devices

*Zhi-Jun Zhao,<sup>a,‡</sup> Junseong Ahn,<sup>b,c,‡</sup> Dongheon Lee,<sup>d</sup> Chan Bae Jeong,<sup>e</sup> Mingu Kang,<sup>c</sup> Jungrak Choi,<sup>c</sup> Moonjeong Bok,<sup>b</sup> Soonhyoung Hwang,<sup>b</sup> Sohee Jeon,<sup>b</sup> Sooyeon Park,<sup>d</sup> , Jiwoo Ko,<sup>b,c</sup> Ki Soo Chang,<sup>e</sup> Jung-Woo Choi,<sup>d</sup> Inkyu Park,<sup>c,\*</sup> and Jun-Ho Jeong<sup>b,\*</sup>*

<sup>a</sup> Institute of Smart City and Intelligent Transportation, Southwest Jiaotong University, No. 999 Pidu District, Chengdu, Sichuan, China

<sup>b</sup> Department of Nano Manufacturing Technology, Korea Institute of Machinery and Materials (KIMM), Daejeon 34103, Republic of Korea

<sup>c</sup> Department of Mechanical Engineering, Korea Advanced Institute of Science and Technology (KAIST), Daejeon 34141, Republic of Korea

<sup>d</sup> Department of Electrical Engineering, Korea Advanced Institute of Science and Technology (KAIST), Daejeon 34141, Republic of Korea.

<sup>e</sup> Center for Scientific Instrumentation, Korea Basic Science Institute (KBSI), Daejeon 34133, Republic of Korea

\*E-mail: [inkyu@kaist.ac.kr](mailto:inkyu@kaist.ac.kr) (I. P.), [jhjeong@kimm.re.kr](mailto:jhjeong@kimm.re.kr) (J.-H. J.)

**KEYWORDS:** nanowelding, suspended nanostructures, 3D nanostructures, thermoacoustic speaker, hydrogen gas sensor

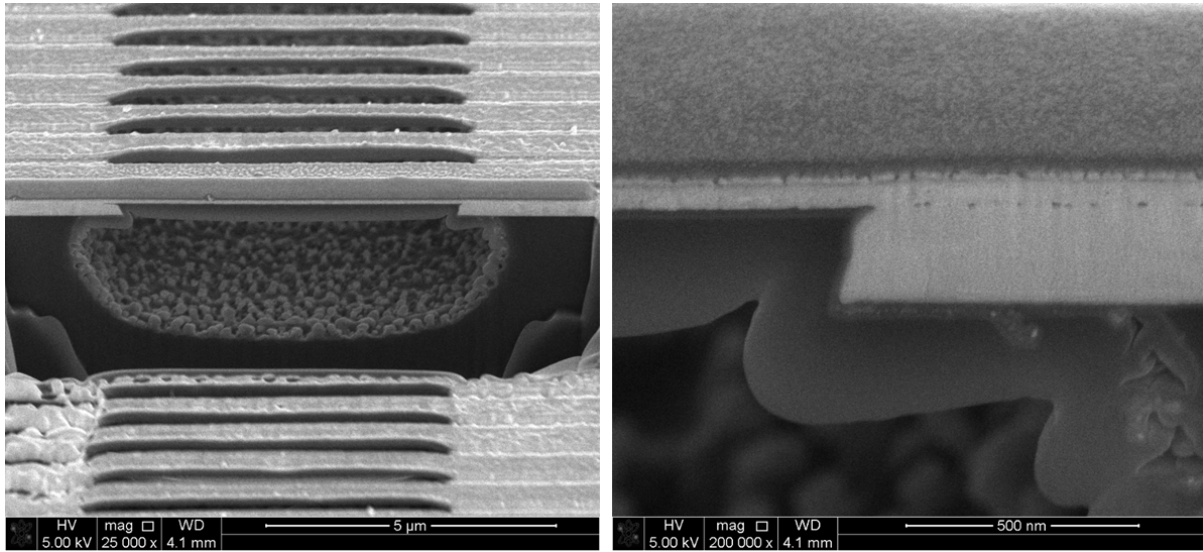

**Figure S1.** FIB cross-sectional images of suspended nanowires demonstrating the point of welding.

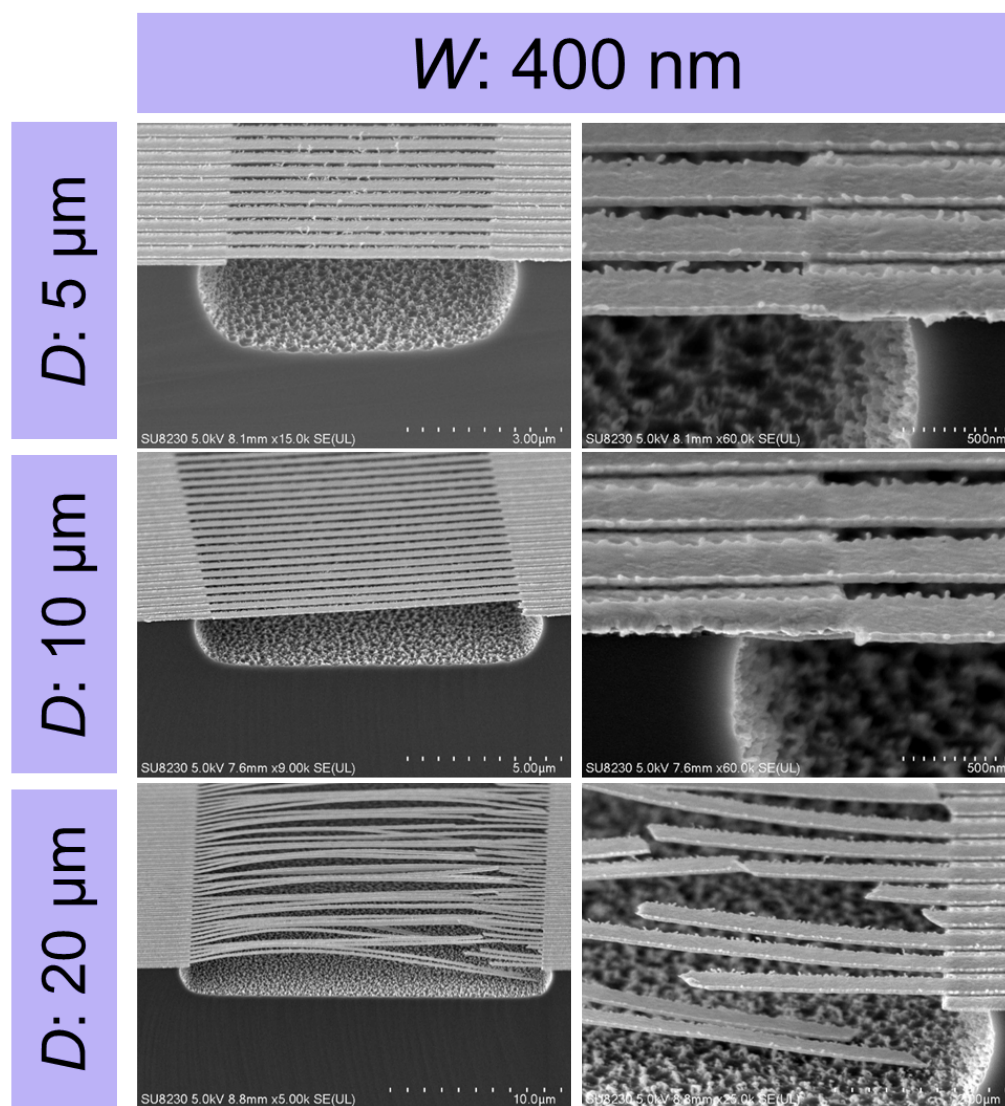

**Figure S2.** Tilted SEM images of suspended nanowires with a width ( $W$ ) of 400 nm and distance ( $D$ ) between “bridge piers” of 5, 10, and 20  $\mu\text{m}$ .

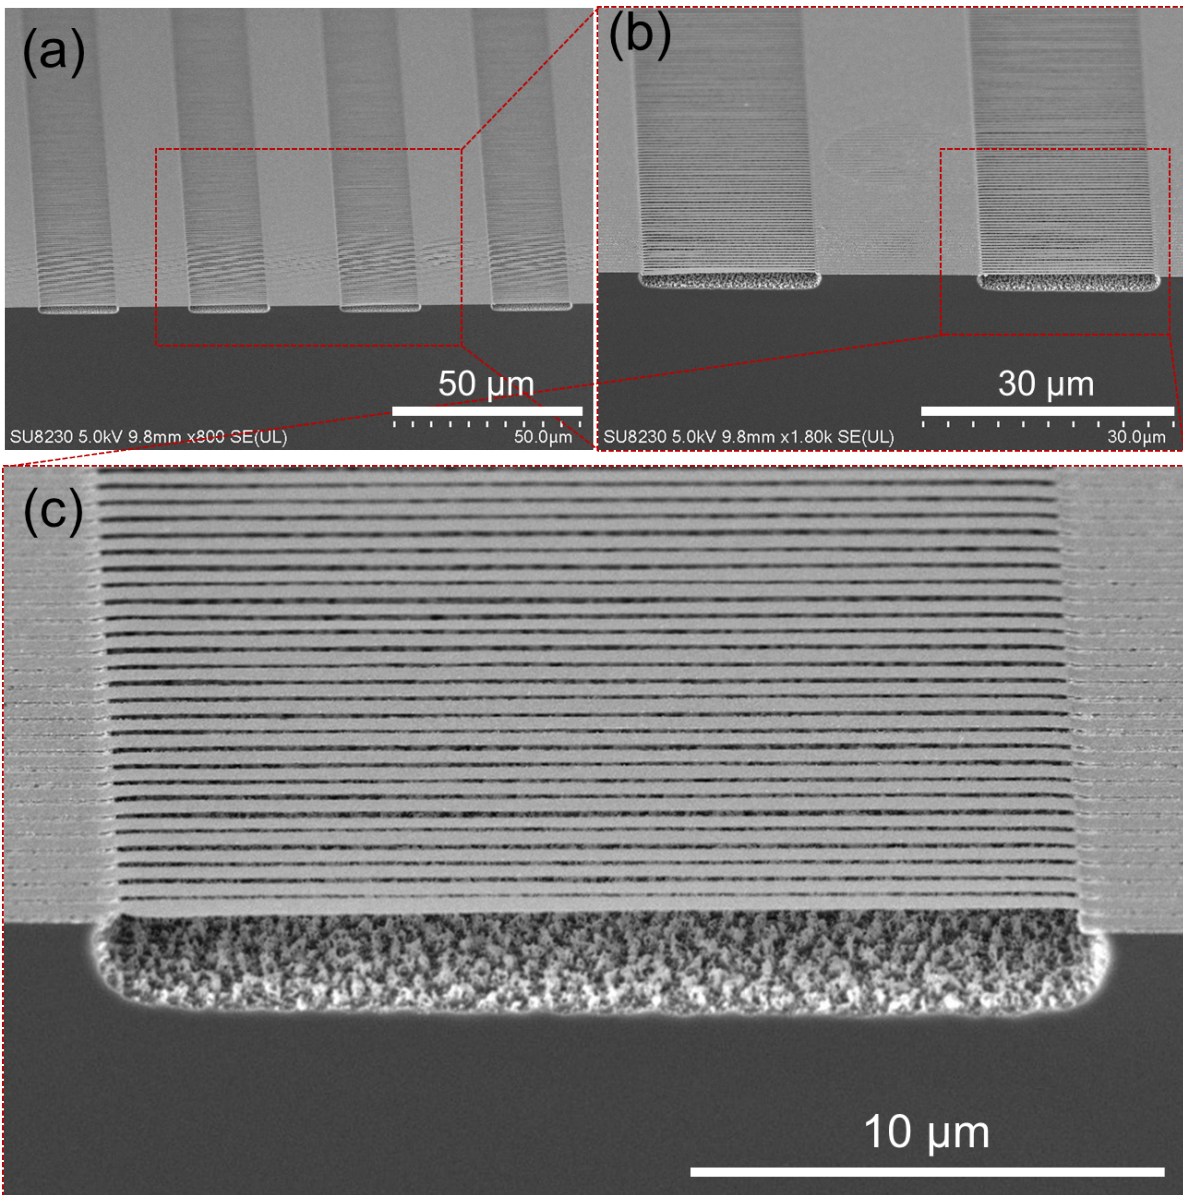

**Figure S3.** Tilted large-scale SEM images of suspended nanowires with a width of 600 nm and distance between “bridge piers” of 20 μm; scale bar (a) 50 μm, (b) 30 μm, (c) 10 μm.

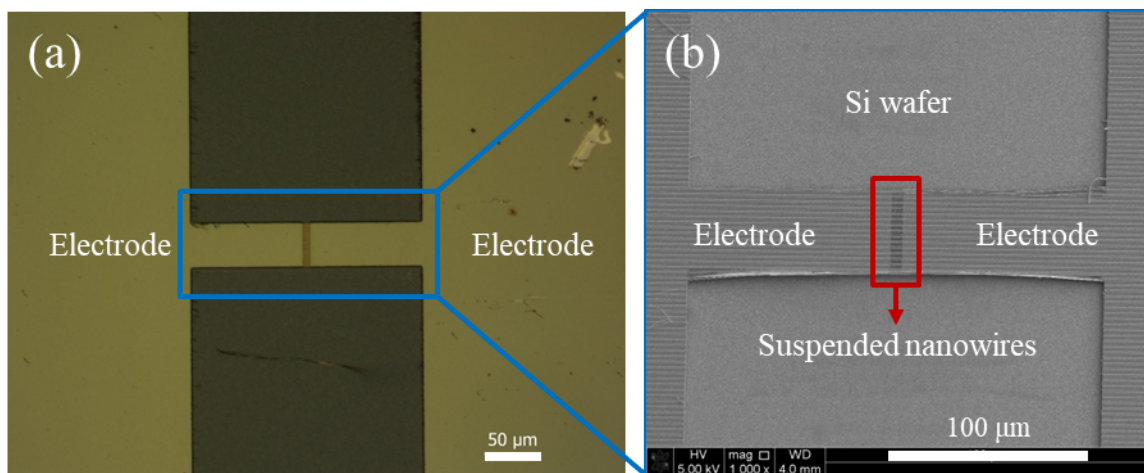

**Figure S4.** (a) Optical microscopy image and (b) SEM image of the suspended Pd nanowire-based gas sensor.

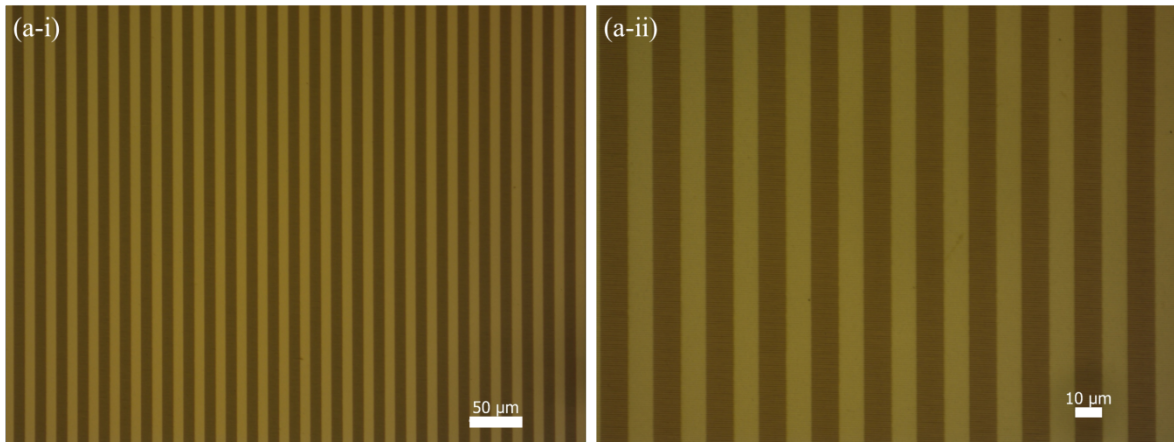

**Figure S5.** Microscopy images of the suspended nanowire-based thermoacoustic speaker; (a-i) reduced view and (a-ii) enlarged view.



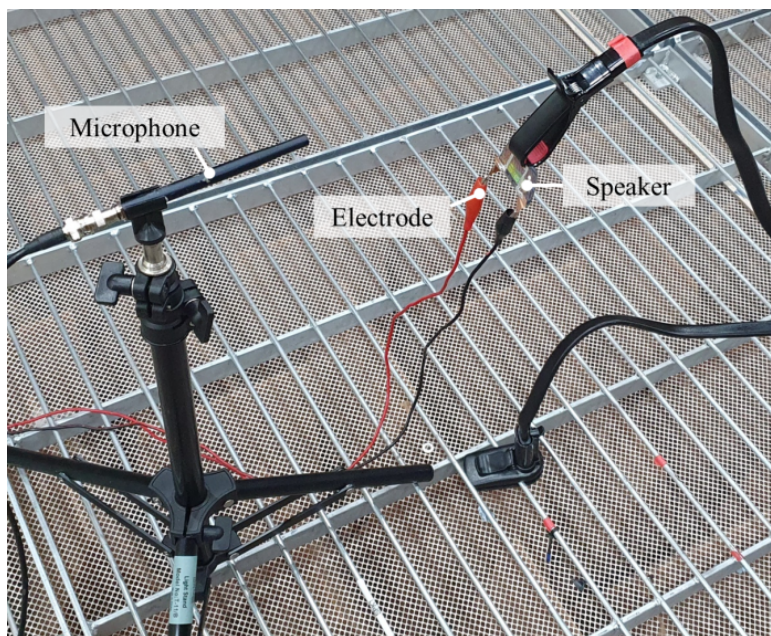

**Figure S6.** Photographic image of the experimental setup used for characterizing the thermoacoustic speaker.
